# Supplementary material for: Antibiotic prescribing for upper respiratory tract infections and acute bronchitis: a longitudinal analysis of general practitioner trainees
Source: PubMed Central journal article supplement (PMC9680663; doi:10.1093/fampra/cmac052), 2022-05-28
Supplement: cmac052_suppl_supplementary_appendix_table_1.pdf [file cmac052_suppl_supplementary_appendix_table_1.pdf]

**Appendix Table 1: Characteristics associated with prescribing antibiotics for URTI over time**

| Variable                                 | Class                 | Antibiotics prescribed<br>(n, unadjusted proportion %) |        |      |        | p-value |
|------------------------------------------|-----------------------|--------------------------------------------------------|--------|------|--------|---------|
|                                          |                       | No                                                     | Yes    |      |        |         |
| <b>Longitudinal factors</b>              |                       |                                                        |        |      |        |         |
| Year of consultation                     | mean (SD)             | 8(2)                                                   | 6(3)   |      | <0.001 |         |
|                                          | 2010                  | 249                                                    | 72%    | 97   | 28%    |         |
|                                          | 2011                  | 717                                                    | 77%    | 220  | 23%    |         |
|                                          | 2012                  | 1446                                                   | 81%    | 337  | 19%    |         |
|                                          | 2013                  | 2063                                                   | 88%    | 283  | 12%    |         |
|                                          | 2014                  | 2351                                                   | 88%    | 323  | 12%    |         |
|                                          | 2015                  | 2597                                                   | 89%    | 324  | 11%    |         |
|                                          | 2016                  | 1773                                                   | 90%    | 197  | 10%    |         |
|                                          | 2017                  | 3283                                                   | 88%    | 451  | 12%    |         |
|                                          | 2018                  | 4874                                                   | 85%    | 851  | 15%    |         |
|                                          | 2019                  | 5179                                                   | 87%    | 757  | 13%    |         |
| <b>Patient factors</b>                   |                       |                                                        |        |      |        |         |
| Patient age group                        | 0-<5 years            | 6065                                                   | 91%    | 566  | 9%     | <0.001  |
|                                          | 05-14 years           | 3628                                                   | 89%    | 433  | 11%    |         |
|                                          | 15-24 years           | 3324                                                   | 87%    | 506  | 13%    |         |
|                                          | 25-44 years           | 6371                                                   | 86%    | 1063 | 14%    |         |
|                                          | 45-64 years           | 3651                                                   | 82%    | 793  | 18%    |         |
|                                          | 65 years+             | 1219                                                   | 74%    | 426  | 26%    |         |
| Patient gender                           | Female                | 13668                                                  | 86%    | 2177 | 14%    | 0.28    |
|                                          | Male                  | 10383                                                  | 87%    | 1586 | 13%    |         |
| Aboriginal and/or Torres Strait Islander | No                    | 22588                                                  | 87%    | 3521 | 13%    | 0.32    |
|                                          | Yes                   | 345                                                    | 84%    | 65   | 16%    |         |
| Non-english speaking background          | No                    | 20801                                                  | 86%    | 3260 | 14%    | 0.70    |
|                                          | Yes                   | 2282                                                   | 87%    | 348  | 13%    |         |
| Patient/practice status                  | Existing patient      | 5399                                                   | 86%    | 869  | 14%    | 0.62    |
|                                          | New to practice       | 2373                                                   | 86%    | 382  | 14%    |         |
|                                          | New to registrar      | 16345                                                  | 87%    | 2510 | 13%    |         |
| <b>Registrar factors</b>                 |                       |                                                        |        |      |        |         |
| Registrar age                            | Mean, years (SD)      | 32 (6)                                                 | 33 (6) |      | <0.001 |         |
| Registrar gender                         | Female                | 14183                                                  | 87%    | 2138 | 13%    | 0.096   |
|                                          | Male                  | 10349                                                  | 86%    | 1702 | 14%    |         |
| Registrar FT or PT                       | Full-time             | 18405                                                  | 86%    | 2962 | 14%    | 0.11    |
|                                          | Part-time             | 5345                                                   | 88%    | 728  | 12%    |         |
| Term                                     | Term 1                | 9338                                                   | 86%    | 1527 | 14%    | 0.17    |
|                                          | Term 2                | 8899                                                   | 87%    | 1385 | 13%    |         |
|                                          | Term 3                | 6295                                                   | 87%    | 928  | 13%    |         |
| Worked at practice previously            | No                    | 19664                                                  | 87%    | 3031 | 13%    | 0.57    |
|                                          | Yes                   | 4644                                                   | 86%    | 753  | 14%    |         |
| Qualified as doctor in Australia         | No                    | 3695                                                   | 82%    | 837  | 18%    | <0.001  |
|                                          | Yes                   | 20742                                                  | 87%    | 2982 | 13%    |         |
| <b>Practice factors</b>                  |                       |                                                        |        |      |        |         |
| SEIFA index                              | mean (SD)             | 6 (3)                                                  | 5 (3)  |      | 0.006  |         |
| Practice size                            | Large                 | 14867                                                  | 87%    | 2165 | 13%    | 0.002   |
|                                          | Small                 | 8831                                                   | 85%    | 1539 | 15%    |         |
| Practice routinely bulk bills            | No                    | 15966                                                  | 86%    | 2552 | 14%    | 0.19    |
|                                          | Yes                   | 8295                                                   | 87%    | 1252 | 13%    |         |
| Rurality                                 | Inner regional        | 5011                                                   | 84%    | 946  | 16%    | <0.001  |
|                                          | Major city            | 17860                                                  | 88%    | 2533 | 12%    |         |
|                                          | Outer regional remote | 1657                                                   | 82%    | 361  | 18%    |         |
| Training Region                          | Region 1              | 3946                                                   | 83%    | 811  | 17%    | <0.001  |

| Variable                    | Class                   | Antibiotics prescribed<br>(n, unadjusted proportion %) |     |        |     | p-value |
|-----------------------------|-------------------------|--------------------------------------------------------|-----|--------|-----|---------|
|                             |                         | No                                                     |     | Yes    |     |         |
|                             | Region 2                | 1360                                                   | 86% | 219    | 14% |         |
|                             | Region 3                | 1939                                                   | 87% | 278    | 13% |         |
|                             | Region 4                | 9455                                                   | 88% | 1266   | 12% |         |
|                             | Region 5                | 256                                                    | 82% | 56     | 18% |         |
|                             | Region 6                | 5577                                                   | 86% | 879    | 14% |         |
|                             | Region 7                | 1999                                                   | 86% | 331    | 14% |         |
| <b>Consultation factors</b> |                         |                                                        |     |        |     |         |
| Consultation duration       | Mean, minutes (SD)      | 15 (7)                                                 |     | 15 (7) |     | <0.001  |
| Number of problems          | mean (SD)               | 1 (1)                                                  |     | 1 (1)  |     | 0.004   |
| Sought help any source      | None                    | 14183                                                  | 87% | 2138   | 13% | <0.001  |
|                             | Other sources           | 10349                                                  | 86% | 1702   | 14% |         |
|                             | Supervisor              | 18405                                                  | 86% | 2962   | 14% |         |
| Pathology ordered           | No                      | 5345                                                   | 88% | 728    | 12% | <0.001  |
|                             | Yes                     | 9338                                                   | 86% | 1527   | 14% |         |
| Imaging ordered             | No                      | 8899                                                   | 87% | 1385   | 13% | <0.001  |
|                             | Yes                     | 6295                                                   | 87% | 928    | 13% |         |
| Referral ordered            | No                      | 19664                                                  | 87% | 3031   | 13% | 0.075   |
|                             | Yes                     | 4644                                                   | 86% | 753    | 14% |         |
| Follow-up ordered           | GP appointment or phone | 3695                                                   | 82% | 837    | 18% | <0.001  |
|                             | None                    | 20742                                                  | 87% | 2982   | 13% |         |
|                             | With someone else       | 14183                                                  | 87% | 2138   | 13% |         |
| Learning goals generated    | No                      | 10349                                                  | 86% | 1702   | 14% | <0.001  |
|                             | Yes                     | 18405                                                  | 86% | 2962   | 14% |         |
