# Supplementary material for: Antibiotic prescribing for upper respiratory tract infections and acute bronchitis: a longitudinal analysis of general practitioner trainees
Source: PubMed Central journal article supplement (PMC9680663; doi:10.1093/fampra/cmac052), 2022-05-28
Supplement: cmac052_suppl_supplementary_appendix_table_2.pdf [file cmac052_suppl_supplementary_appendix_table_2.pdf]

**Appendix Table 2: Characteristics associated with prescribing antibiotics for acute bronchitis over time**

| Variable                                 | Class            | Antibiotics prescribed<br>(n, unadjusted proportion %) |     |      |     | p-value |
|------------------------------------------|------------------|--------------------------------------------------------|-----|------|-----|---------|
|                                          |                  | No                                                     |     | Yes  |     |         |
| <b>Longitudinal factors</b>              |                  |                                                        |     |      |     |         |
| Year of consultation                     | Mean (SD)        |                                                        |     |      |     |         |
|                                          | 2010             | 17                                                     | 18% | 76   | 82% | <0.001  |
|                                          | 2011             | 39                                                     | 16% | 204  | 84% |         |
|                                          | 2012             | 85                                                     | 23% | 285  | 77% |         |
|                                          | 2013             | 99                                                     | 24% | 321  | 76% |         |
|                                          | 2014             | 125                                                    | 24% | 404  | 76% |         |
|                                          | 2015             | 131                                                    | 21% | 489  | 79% |         |
|                                          | 2016             | 105                                                    | 31% | 233  | 69% |         |
|                                          | 2017             | 179                                                    | 28% | 462  | 72% |         |
|                                          | 2018             | 268                                                    | 28% | 693  | 72% |         |
|                                          | 2019             | 292                                                    | 27% | 782  | 73% |         |
| <b>Patient factors</b>                   |                  |                                                        |     |      |     |         |
| Patient age group                        | 0-<5 years       | 551                                                    | 59% | 388  | 41% | <0.001  |
|                                          | 05-14 years      | 78                                                     | 21% | 295  | 79% |         |
|                                          | 15-24 years      | 73                                                     | 18% | 328  | 82% |         |
|                                          | 25-44 years      | 225                                                    | 19% | 941  | 81% |         |
|                                          | 45-64 years      | 234                                                    | 18% | 1062 | 82% |         |
|                                          | 65 years+        | 167                                                    | 16% | 883  | 84% |         |
| Patient gender                           | Female           | 696                                                    | 24% | 2176 | 76% | 0.098   |
|                                          | Male             | 611                                                    | 26% | 1698 | 74% |         |
| Aboriginal and/or Torres Strait Islander | No               | 1218                                                   | 25% | 3601 | 75% | 0.32    |
|                                          | Yes              | 32                                                     | 29% | 79   | 71% |         |
| Non-english speaking background          | No               | 1165                                                   | 25% | 3456 | 75% | 0.75    |
|                                          | Yes              | 88                                                     | 27% | 241  | 73% |         |
| Patient/practice status                  | Existing patient | 400                                                    | 28% | 1023 | 72% | 0.04    |
|                                          | New to practice  | 117                                                    | 25% | 352  | 75% |         |
|                                          | New to registrar | 797                                                    | 24% | 2482 | 76% |         |
| <b>Registrar factors</b>                 |                  |                                                        |     |      |     |         |
| Registrar age                            | Mean, years (SD) | 32                                                     | (6) | 33   | (6) | 0.017   |
| Registrar gender                         | Female           | 784                                                    | 25% | 2390 | 75% | 0.43    |
|                                          | Male             | 556                                                    | 26% | 1559 | 74% |         |
| Registrar FT or PT                       | Full-time        | 1020                                                   | 26% | 2967 | 74% | 0.47    |
|                                          | Part-time        | 272                                                    | 25% | 801  | 75% |         |
| Term                                     | Term 1           | 532                                                    | 28% | 1387 | 72% | 0.003   |
|                                          | Term 2           | 469                                                    | 23% | 1537 | 77% |         |
|                                          | Term 3           | 339                                                    | 25% | 1025 | 75% |         |
| Worked at practice previously            | No               | 1055                                                   | 26% | 2999 | 74% | 0.056   |
|                                          | Yes              | 268                                                    | 23% | 898  | 77% |         |
| Qualified as doctor in Australia         | No               | 274                                                    | 23% | 905  | 77% | 0.071   |
|                                          | Yes              | 1062                                                   | 26% | 3023 | 74% |         |
| <b>Practice factors</b>                  |                  |                                                        |     |      |     |         |
| SEIFA index                              | Mean (SD)        | 6                                                      | (3) | 6    | (3) | 0.84    |
| Practice size                            | Large            | 800                                                    | 24% | 2489 | 76% | 0.065   |
|                                          | Small            | 493                                                    | 27% | 1307 | 73% |         |
| Practice routinely bulk bills            | No               | 980                                                    | 25% | 2921 | 75% | 0.81    |
|                                          | Yes              | 353                                                    | 26% | 998  | 74% |         |
| Rurality                                 | Inner regional   | 336                                                    | 23% | 1141 | 77% | 0.042   |
|                                          | Major city       | 873                                                    | 27% | 2399 | 73% |         |

| Variable                    | Class                   | Antibiotics prescribed<br>(n, unadjusted proportion %) |     |      |     | p-value |
|-----------------------------|-------------------------|--------------------------------------------------------|-----|------|-----|---------|
|                             |                         | No                                                     |     | Yes  |     |         |
| Training Region             | Outer regional remote   | 131                                                    | 24% | 409  | 76% | 0.20    |
|                             | Region 1                | 83                                                     | 28% | 209  | 72% |         |
|                             | Region 2                | 143                                                    | 27% | 383  | 73% |         |
|                             | Region 3                | 411                                                    | 22% | 1461 | 78% |         |
|                             | Region 4                | 24                                                     | 22% | 87   | 78% |         |
|                             | Region 5                | 241                                                    | 29% | 586  | 71% |         |
|                             | Region 6                | 126                                                    | 28% | 328  | 72% |         |
|                             | Region 7                | 312                                                    | 26% | 895  | 74% |         |
| <b>Consultation factors</b> |                         |                                                        |     |      |     |         |
| Consultation duration       | Mean, minutes (SD)      | 18                                                     | (8) | (17) | (7) | <0.001  |
| Number of problems          | mean (SD)               | 1                                                      | (1) | (1)  | (1) | 0.99    |
| Sought help any source      | None                    | 1095                                                   | 26% | 3108 | 74% | <0.001  |
|                             | Other sources           | 149                                                    | 18% | 665  | 82% |         |
|                             | Supervisor              | 96                                                     | 35% | 176  | 65% |         |
| Pathology ordered           | No                      | 1220                                                   | 26% | 3500 | 74% | 0.009   |
|                             | Yes                     | 120                                                    | 21% | 449  | 79% |         |
| Imaging ordered             | No                      | 1250                                                   | 27% | 3453 | 73% | <0.001  |
|                             | Yes                     | 90                                                     | 15% | 496  | 85% |         |
| Referral ordered            | No                      | 1243                                                   | 24% | 3918 | 76% | <0.001  |
|                             | Yes                     | 97                                                     | 76% | 31   | 24% |         |
| Follow-up ordered           | GP appointment or phone | 548                                                    | 23% | 1836 | 77% | 0.002   |
|                             | None                    | 723                                                    | 28% | 1903 | 72% |         |
|                             | With someone else       | 69                                                     | 25% | 210  | 75% |         |
| Learning goals generated    | No                      | 1077                                                   | 25% | 3258 | 75% | 0.087   |
|                             | Yes                     | 175                                                    | 28% | 446  | 72% |         |
