# Supplementary material for: Antibiotic prescribing for upper respiratory tract infections and acute bronchitis: a longitudinal analysis of general practitioner trainees
Source: PubMed Central journal article supplement (PMC9680663; doi:10.1093/fampra/cmac052), 2022-05-28
Supplement: cmac052_suppl_supplementary_appendix_table_3.pdf [file cmac052_suppl_supplementary_appendix_table_3.pdf]

**Appendix Table 3: Univariate and multivariable analysis for upper respiratory tract infections antibiotic prescribing**

| URTI                                     |                         | Univariate model (all covariates model)<br>Adjusted model |                   | Multivariable model (with significant univariates)<br>Adjusted model |                   |
|------------------------------------------|-------------------------|-----------------------------------------------------------|-------------------|----------------------------------------------------------------------|-------------------|
| Variable                                 | Class                   | OR (95% CI)                                               | p-value           | OR (95% CI)                                                          | p-value           |
| <b>Longitudinal factor</b>               |                         |                                                           |                   |                                                                      |                   |
| Year of consultation                     |                         | 0.91 (0.88, 0.93)                                         | <0.001            | 0.90 (0.88, 0.93)                                                    | <0.001            |
| <b>Patient factors</b>                   |                         |                                                           |                   |                                                                      |                   |
| Aboriginal and/or Torres Strait Islander | Yes                     | 0.97 (0.66, 1.41)                                         | 0.86              |                                                                      |                   |
| Non-english speaking background          | Yes                     | 1.03 (0.87, 1.21)                                         | 0.74              |                                                                      |                   |
| Patient gender                           | Female                  | 0.97 (0.89, 1.07)                                         | 0.58              |                                                                      |                   |
| Patient age group                        | 05-14 years             | 1.48 (1.25, 1.75)                                         | <0.001            | 1.49 (1.27, 1.74)                                                    | <0.001            |
|                                          | 15-24 years             | 2.06 (1.75, 2.43)                                         | <0.001            | 2.06 (1.76, 2.41)                                                    | <0.001            |
|                                          | 25-44 years             | 2.36 (2.05, 2.72)                                         | <0.001            | 2.39 (2.09, 2.73)                                                    | <0.001            |
|                                          | 45-64 years             | 3.03 (2.61, 3.53)                                         | <0.001            | 3.05 (2.64, 3.52)                                                    | <0.001            |
|                                          | 65 years+               | 4.70 (3.90, 5.68)                                         | <0.001            | 4.70 (3.93, 5.63)                                                    | <0.001            |
| Patient/practice status                  | New to registrar        | 1.00 (0.89, 1.11)                                         | 0.95              |                                                                      |                   |
|                                          | New to practice         | 1.06 (0.89, 1.26)                                         | 0.53              |                                                                      |                   |
| <b>Registrar factors</b>                 |                         |                                                           |                   |                                                                      |                   |
| Qualified as doctor in Australia         | Yes                     | 0.72 (0.59, 0.87)                                         | 0.001             | 0.76 (0.63, 0.92)                                                    | 0.004             |
| Registrar FTE*                           | Part-time               | 0.88 (0.77, 1.01)                                         | 0.072             | 0.92 (0.81, 1.04)                                                    | 0.19              |
| Registrar age                            |                         | 0.99 (0.97, 1.00)                                         | 0.022             | 0.99 (0.98, 1.00)                                                    | 0.037             |
| Registrar gender                         | Female                  | 0.91 (0.80, 1.04)                                         | 0.16              | 0.91 (0.81, 1.04)                                                    | 0.17              |
| Training term/post                       | Term 2                  | 1.17 (1.03, 1.32)                                         | 0.013             | 1.11 (1.00, 1.23)                                                    | 0.05              |
|                                          | Term 3                  | 1.23 (1.08, 1.40)                                         | 0.002             | 1.17 (1.04, 1.32)                                                    | 0.009             |
| Worked at practice previously            | Yes                     | 0.94 (0.81, 1.08)                                         | 0.37              |                                                                      |                   |
| <b>Practice factors</b>                  |                         |                                                           |                   |                                                                      |                   |
| Practice routinely bulk bills            | Yes                     | 0.87 (0.76, 1.00)                                         | 0.048             | 0.87 (0.76, 0.99)                                                    | 0.035             |
| Practice size                            | Small                   | 1.10 (0.99, 1.24)                                         | 0.079             | 1.11 (0.99, 1.23)                                                    | 0.064             |
| Training Region                          | Region 2                | 0.92 (0.68, 1.25)                                         | 0.6               | 0.88 (0.65, 1.18)                                                    | 0.38              |
|                                          | Region 3                | 0.72 (0.54, 0.96)                                         | 0.028             | 0.69 (0.52, 0.91)                                                    | 0.008             |
|                                          | Region 4                | 0.80 (0.66, 0.97)                                         | 0.026             | 0.81 (0.67, 0.97)                                                    | 0.024             |
|                                          | Region 5                | 0.73 (0.42, 1.28)                                         | 0.27              | 0.71 (0.41, 1.21)                                                    | 0.21              |
|                                          | Region 6                | 1.28 (1.00, 1.65)                                         | 0.054             | 1.32 (1.03, 1.68)                                                    | 0.025             |
|                                          | Region 7                | 0.97 (0.72, 1.30)                                         | 0.82              | 0.99 (0.75, 1.31)                                                    | 0.93              |
|                                          | Rurality                | Inner regional                                            | 1.12 (0.93, 1.34) | 0.23                                                                 | 1.13 (0.95, 1.34) |
|                                          | Outer regional remote   | 1.43 (1.08, 1.89)                                         | 0.012             | 1.51 (1.16, 1.98)                                                    | 0.003             |
| SEIFA Index                              |                         | 1.00 (0.98, 1.02)                                         | 0.98              | 1.01 (0.98, 1.03)                                                    | 0.62              |
| <b>Consultation factors</b>              |                         |                                                           |                   |                                                                      |                   |
| Consultation duration                    |                         | 1.02 (1.02, 1.03)                                         | <0.001            | 1.02 (1.02, 1.03)                                                    | <0.001            |
| Number of problems                       |                         | 0.77 (0.71, 0.82)                                         | <0.001            | 0.77 (0.72, 0.83)                                                    | <0.001            |
| Sought assistance                        | Other sources           | 5.87 (4.86, 7.08)                                         | <0.001            | 5.60 (4.68, 6.69)                                                    | <0.001            |
|                                          | Supervisor              | 2.41 (1.72, 3.36)                                         | <0.001            | 2.35 (1.72, 3.21)                                                    | <0.001            |
| <b>Consultation outcome factors</b>      |                         |                                                           |                   |                                                                      |                   |
| Follow up ordered                        | GP appointment or phone | 1.51 (1.35, 1.69)                                         | <0.001            | 1.52 (1.36, 1.69)                                                    | <0.001            |
|                                          | With someone else       | 1.35 (1.00, 1.81)                                         | 0.047             | 1.33 (1.00, 1.77)                                                    | 0.05              |
| Imaging ordered                          | Yes                     | 1.44 (0.90, 2.31)                                         | 0.13              | 1.44 (0.92, 2.26)                                                    | 0.11              |
| Learning goals generated                 | Yes                     | 1.50 (1.20, 1.88)                                         | <0.001            | 1.39 (1.12, 1.73)                                                    | 0.002             |
| Pathology ordered                        | Yes                     | 1.38 (1.14, 1.66)                                         | <0.001            | 1.41 (1.18, 1.69)                                                    | <0.001            |
| Referral ordered                         | Yes                     | 1.07 (0.54, 2.12)                                         | 0.84              | 1.19 (0.62, 2.27)                                                    | 0.60              |

\*FTE= full time employment
