# Supplementary material for: Antibiotic prescribing for upper respiratory tract infections and acute bronchitis: a longitudinal analysis of general practitioner trainees
Source: PubMed Central journal article supplement (PMC9680663; doi:10.1093/fampra/cmac052), 2022-05-28
Supplement: cmac052_suppl_supplementary_appendix_table_4.pdf [file cmac052_suppl_supplementary_appendix_table_4.pdf]

**Appendix Table 4: Univariate and multivariable analyses: acute bronchitis**

| Acute bronchitis                         |                         | Univariate model (all covariates model)<br>Adjusted model |                   | Multivariable model (with significant univariates)<br>Adjusted model |                   |
|------------------------------------------|-------------------------|-----------------------------------------------------------|-------------------|----------------------------------------------------------------------|-------------------|
| Variable                                 | Class                   | OR (95% CI)                                               | p-value           | OR (95% CI)                                                          | p-value           |
| Longitudinal factor                      |                         |                                                           |                   |                                                                      |                   |
| Year of consultation                     |                         | 0.92 (0.88, 0.96)                                         | <0.001            | 0.91 (0.87, 0.95)                                                    | <0.001            |
| Patient factors                          |                         |                                                           |                   |                                                                      |                   |
| Aboriginal and/or Torres Strait Islander | Yes                     | 1.35 (0.74, 2.49)                                         | 0.33              | 1.34 (0.73, 2.46)                                                    | 0.35              |
| Non-english speaking background          | Yes                     | 1.01 (0.70, 1.45)                                         | 0.97              |                                                                      |                   |
| Patient gender                           | Female                  | 0.90 (0.75, 1.07)                                         | 0.23              | 0.92 (0.78, 1.10)                                                    | 0.37              |
| Patient age group                        | 05-14 years             | 6.73 (4.61, 9.83)                                         | <0.001            | 6.46 (4.46, 9.37)                                                    | <0.001            |
|                                          | 15-24 years             | 8.01 (5.45, 11.8)                                         | <0.001            | 7.75 (5.32, 11.3)                                                    | <0.001            |
|                                          | 25-44 years             | 7.00 (5.36, 9.15)                                         | <0.001            | 6.59 (5.08, 8.55)                                                    | <0.001            |
|                                          | 45-64 years             | 7.48 (5.71, 9.80)                                         | <0.001            | 7.13 (5.49, 9.26)                                                    | <0.001            |
|                                          | 65 years+               | 8.71 (6.53, 11.6)                                         | <0.001            | 8.31 (6.27, 11.0)                                                    | <0.001            |
| Patient/practice status                  | New to registrar        | 1.22 (1.00, 1.49)                                         | 0.056             | 1.25 (1.03, 1.53)                                                    | 0.023             |
|                                          | New to practice         | 1.31 (0.93, 1.85)                                         | 0.12              | 1.36 (0.97, 1.90)                                                    | 0.074             |
| Registrar factors                        |                         |                                                           |                   |                                                                      |                   |
| Qualified as doctor in Australia         | Yes                     | 0.94 (0.70, 1.26)                                         | 0.68              | 0.92 (0.69, 1.23)                                                    | 0.59              |
| Registrar FTE*                           | Part-time               | 0.96 (0.76, 1.22)                                         | 0.75              |                                                                      |                   |
| Registrar age                            |                         | 1.01 (0.99, 1.03)                                         | 0.19              | 1.01 (0.99, 1.03)                                                    | 0.20              |
| Registrar gender                         | Female                  | 1.16 (0.95, 1.42)                                         | 0.15              |                                                                      |                   |
| Training term/post                       | Term 2                  | 1.30 (1.02, 1.64)                                         | 0.031             | 1.30 (1.03, 1.64)                                                    | 0.026             |
|                                          | Term 3                  | 1.22 (0.96, 1.55)                                         | 0.11              | 1.21 (0.95, 1.54)                                                    | 0.12              |
| Worked at practice previously            | Yes                     | 1.14 (0.88, 1.47)                                         | 0.34              | 1.13 (0.87, 1.46)                                                    | 0.35              |
| Practice factors                         |                         |                                                           |                   |                                                                      |                   |
| Practice routinely bulk bills            | Yes                     | 1.10 (0.86, 1.42)                                         | 0.44              |                                                                      |                   |
| Practice size                            | Small                   | 0.86 (0.71, 1.05)                                         | 0.14              | 0.89 (0.73, 1.07)                                                    | 0.22              |
| Training Region                          | Region 2                | 0.73 (0.47, 1.14)                                         | 0.17              | 0.75 (0.48, 1.16)                                                    | 0.20              |
|                                          | Region 3                | 0.76 (0.51, 1.12)                                         | 0.16              | 0.76 (0.51, 1.11)                                                    | 0.15              |
|                                          | Region 4                | 1.54 (1.16, 2.05)                                         | 0.003             | 1.55 (1.18, 2.03)                                                    | 0.002             |
|                                          | Region 5                | 1.27 (0.58, 2.75)                                         | 0.55              | 1.24 (0.58, 2.67)                                                    | 0.58              |
|                                          | Region 6                | 1.40 (0.94, 2.07)                                         | 0.095             | 1.52 (1.06, 2.19)                                                    | 0.024             |
|                                          | Region 7                | 0.96 (0.62, 1.48)                                         | 0.84              | 0.96 (0.62, 1.47)                                                    | 0.84              |
|                                          | Rurality                | Inner regional                                            | 1.30 (0.98, 1.73) | 0.074                                                                | 1.29 (0.97, 1.70) |
|                                          | Outer regional remote   | 1.40 (0.92, 2.13)                                         | 0.12              | 1.43 (0.96, 2.12)                                                    | 0.08              |
| SEIFA Index                              |                         | 0.99 (0.96, 1.03)                                         | 0.79              |                                                                      |                   |
| Consultation factors                     |                         |                                                           |                   |                                                                      |                   |
| Consultation duration                    |                         | 0.99 (0.97, 1.00)                                         | 0.066             |                                                                      |                   |
| Number of problems                       |                         | 0.92 (0.81, 1.04)                                         | 0.18              |                                                                      |                   |
| Sought assistance                        | Other sources           | 2.46 (1.83, 3.30)                                         | <0.001            | 2.52 (1.88, 3.36)                                                    | <0.001            |
|                                          | Supervisor              | 1.57 (1.02, 2.42)                                         | 0.04              | 1.60 (1.04, 2.45)                                                    | 0.031             |
| Consultation outcome factors             |                         |                                                           |                   |                                                                      |                   |
| Follow-up ordered                        | GP appointment or phone | 1.51 (1.25, 1.84)                                         | <0.001            | 1.50 (1.24, 1.82)                                                    | <0.001            |
|                                          | With someone else       | 1.32 (0.87, 2.01)                                         | 0.19              | 1.36 (0.90, 2.06)                                                    | 0.143             |
| Imaging ordered                          | Yes                     | 1.31 (0.94, 1.82)                                         | 0.11              | 1.32 (0.95, 1.82)                                                    | 0.098             |
| Learning goals generated                 | Yes                     | 0.85 (0.62, 1.15)                                         | 0.29              | 0.89 (0.65, 1.20)                                                    | 0.43              |
| Pathology ordered                        | Yes                     | 1.00 (0.74, 1.36)                                         | 0.99              | 1.01 (0.74, 1.36)                                                    | 0.97              |
| Referral ordered                         | Yes                     | 0.15 (0.08, 0.28)                                         | <0.001            | 0.15 (0.08, 0.28)                                                    | <0.001            |

\*FTE= full time employment
